# Supplementary material for: Direct imaging of rotating molecules anchored on graphene
Source: Royal Society of Chemistry journal article supplement (doi:10.1039/c6nr04251a), 2016-01-01
Supplement: c6nr04251a1.pdf [file c6nr04251a1.pdf]

Supplementary Information for

**Direct imaging of rotating molecules anchored on graphene**

*Jeongheon Choe<sup>1</sup>, Yangjin Lee<sup>1</sup>, Lei Fang<sup>2</sup>, Gun-Do Lee<sup>3</sup>, Zhenan Bao<sup>4</sup>, Kwanpyo Kim<sup>1,\*</sup>*

<sup>1</sup>Department of Physics, Ulsan National Institute of Science and Technology (UNIST), Ulsan 689-798, South Korea.

<sup>2</sup>Department of Chemistry, Texas A&M University, 3255 TAMU, College Station, TX 77843, U.S.A.

<sup>3</sup>Department of Materials Science and Engineering, Seoul National University, Seoul 151-742, South Korea.

<sup>4</sup>Department of Chemical Engineering, Stanford University, Stanford, CA 94305, U.S.A.

\* To whom correspondence should be addressed: [kpkim@unist.ac.kr](mailto:kpkim@unist.ac.kr)

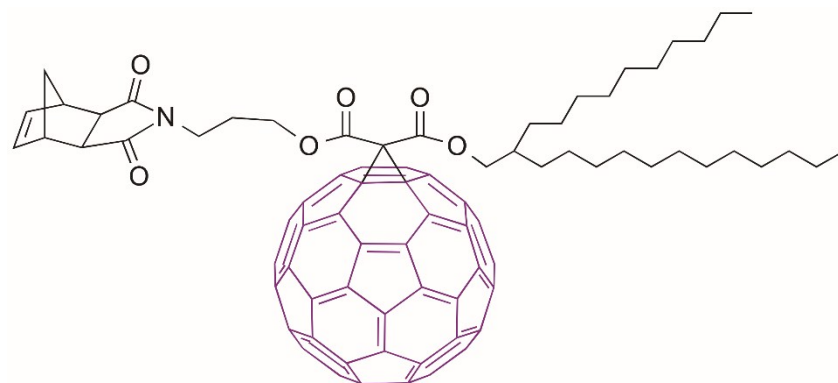

**Supplementary Figure S1. Structural formula of  $C_{60}$ -containing poly(norbornene) derivative ( $m = 3$ ).** The detailed synthesis of molecules can be found in the previous report.<sup>S1</sup>

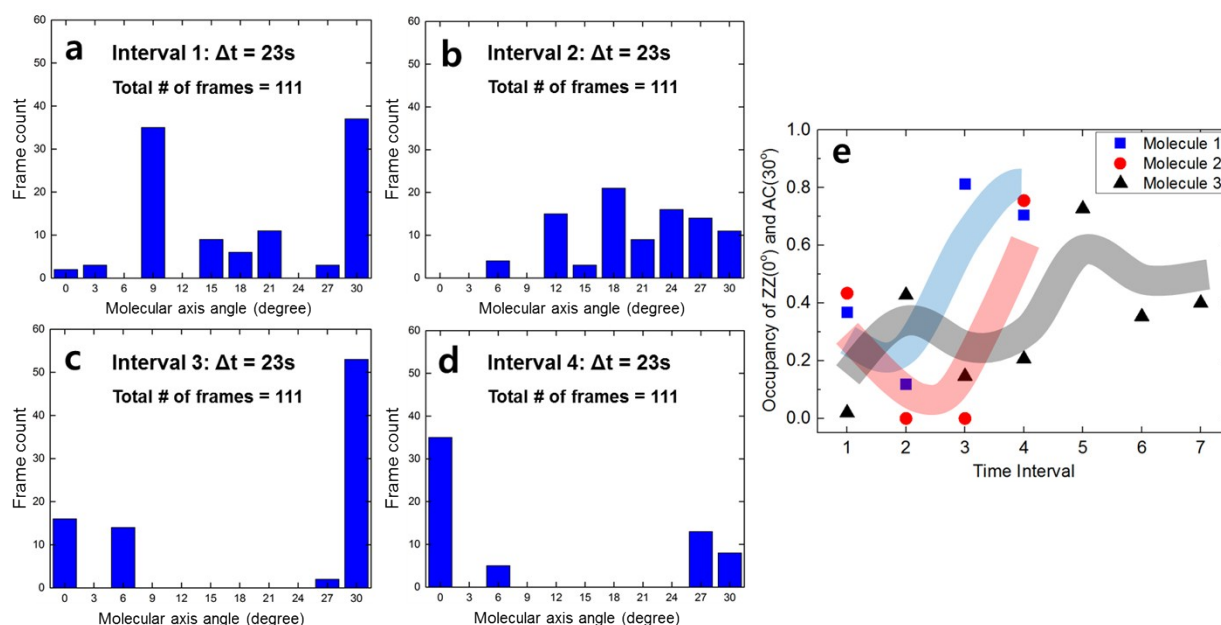

**Supplementary Figure S2. Time-dependent molecular configurations.** (a-d) Angular configuration of molecule 1 for sequential time intervals. (e) The time evolution of occupancy of zigzag(ZZ) and armchair(AC) configurations. The thick lines are guides to the eye.

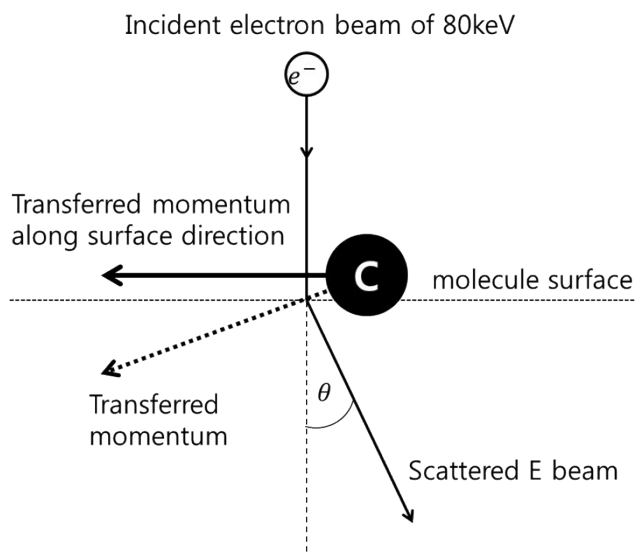

**Supplementary Figure S3. Elastic scattering geometry for surface-directional momentum transfer from incident electron beam to carbon atom in molecule.**

**Supplementary Table 1. The analyzed data set of molecules to estimate the rotational energy barriers.**

| Molecule # | Total # of atoms | Normalized event rate (s <sup>-1</sup> ) | Surface energy barrier threshold (eV) | Energy barrier (meV / atoms)                  | Energy barrier per C <sub>60</sub> (meV / C <sub>60</sub> molecule)                     |
|------------|------------------|------------------------------------------|---------------------------------------|-----------------------------------------------|-----------------------------------------------------------------------------------------|
| 1          | 114              | 1.7±0.8                                  | 0.27                                  | 2.4<br>1.6 (lower limit)<br>4.7 (upper limit) | $1.4 \times 10^2$<br>$9.7 \times 10^1$ (lower limit)<br>$2.8 \times 10^2$ (upper limit) |
| 2          | 267              | 2.7±0.8                                  | 0.40                                  | 1.5<br>1.1 (lower limit)<br>2.1 (upper limit) | $8.9 \times 10^1$<br>$6.8 \times 10^1$ (lower limit)<br>$1.3 \times 10^2$ (upper limit) |
| 3          | 279              | 0.15±0.10                                | 3.3                                   | 12<br>9.6 (lower limit)<br>14 (upper limit)   | $7.0 \times 10^2$<br>$5.8 \times 10^2$ (lower limit)<br>$8.2 \times 10^2$ (upper limit) |

## Supplementary Note 1

### The Coulomb scattering theory for calculating event rate

The differential cross section of elastic scattering<sup>S2</sup> when surface transferred energy  $E$  is given can be written as

$$\frac{d\sigma(E)}{dE} = \frac{\pi Z^2 \gamma^2}{k_0^4 a_0^2 E_{max} \left(1 - \sqrt{1 - \frac{E}{E_{max}}}\right)^2 \sqrt{1 - \frac{E}{E_{max}}}} \quad (S1)$$

where  $Z$  is the atomic number of the target atoms,  $\gamma = (1 - v^2/c^2)^{-1/2}$  the Lorentz factor,  $k_0$  the incident-electron wavenumber,  $a_0$  and the Bohr radius of the hydrogen atom ( $5.3 \times 10^{-11} m$ ).  $E_{max}$  is the maximum surface transferred energy and can be written as

$$E_{max} = \frac{E_0(E_0 + 2m_e c^2)}{2Mc^2} \quad (S2)$$

under the assumption that the target atom mass  $M$  is much heavier than the electron mass  $m_e$  ( $E_0$  is the kinetic energy of the incident electron). At 80 kV TEM operation,  $E_{max}$  is 3.95 eV for carbon atoms.

### Supplementary References

S1. Fang, L.; Liu, P.; Sveinbjornsson, B. R.; Atahan-Evrenk, S.; Vandewal, K.; Osuna, S.; Jimenez-Oses, G.; Shrestha, S.; Giri, G.; Wei, P.; Salleo, A.; Aspuru-Guzik, A.; Grubbs, R. H.; Houk, K. N.; Bao, Z., Confined organization of fullerene units along high polymer chains. *J. Mater. Chem. C* **2013**, *1* (36), 5747-5755.

S2. Egerton, R. F., Beam-induced motion of adatoms in the transmission electron microscope. *Microsc. Microanal.* **2013**, *19* (2), 479-86.
